# Supplementary material
Source: ML conference proceedings conference paper supplement (https://openaccess.thecvf.com/content/CVPR2023/html/Yu_ACR_Attention_Collaboration-Based_CVPR_2023_paper.html)
Supplement: Supplementary file 2 [file Yu_ACR_Attention_Collaboration-Based_CVPR_2023_supplemental.zip]

Archive with 4 entries (3 files):
- (paper5675) ACR-Supplementary Material/
- (paper5675) ACR-Supplementary Material/acr_in_the_wild.mp4
- (paper5675) ACR-Supplementary Material/Supplementary Material_ACR-compressed_1_compressed.pdf
- (paper5675) ACR-Supplementary Material/webcam.mp4
